# Supplementary material for: W-Doped TiO2 for photothermocatalytic CO2 reduction
Source: Royal Society of Chemistry journal article supplement (doi:10.1039/d0nr03393f), 2020-01-01
Supplement: d0nr03393f1.pdf [file d0nr03393f1.pdf]

## Supporting information

Yingying li,<sup>ab</sup> Andrew Walsh,<sup>b</sup> Dashuai Li,<sup>a</sup> David Do,<sup>b</sup> He Ma,<sup>a</sup> Changhua Wang,<sup>a</sup>

Peng Zhang,<sup>\*b</sup> and Xintong Zhang<sup>\*a</sup>

- a. Key Laboratory for UV-Emitting Materials and Technology of Ministry of Education, Northeast Normal University, Changchun 130024, China.

E-mail: [xtzhang@nenu.edu.cn](mailto:xtzhang@nenu.edu.cn)

- b. Department of Chemistry, Dalhousie University, Halifax, NS, Canada.

E-mail: [peng.zhang@dal.ca](mailto:peng.zhang@dal.ca)

## Contents

**Figure S1** Photothermal images of TW0 under 100 mW/cm<sup>2</sup> with 300-800 nm.

**Figure S2** SEM images of TW4 before and after photothermocatalytic CO<sub>2</sub> reduction.

**Figure S3** XRD patterns of TW4 before and after photothermocatalytic CO<sub>2</sub> reduction.

**Figure S4** SEM image and element distribution of Ti, O, and W atoms over sample TW2.

**Figure S5** SEM image and element distribution of Ti, O, and W atoms over sample TW4.

**Figure S6** SEM image and element distribution of Ti, O, and W atoms over sample TW10.

**Figure S7** UV-Vis spectra of TW0, TW2, TW4, and TW10.

**Figure S8** ESR spectra of different samples at 110 K with UV irradiation.

**Figure S9** Ti K-edge EXAFS spectra of different samples.

**Figure S10** W L<sub>III</sub>-edge EXAFS spectra of different samples.

**Figure S11** Ti K-edge XANES spectra of different samples.

**Figure S12** Ti K-edge FT spectra of different samples.

**Table S1** W-O bond distance of W reference.

**Table S2** Coordination number of W reference

Number of pages: 16

Number of tables: 2

Number of figures: 12

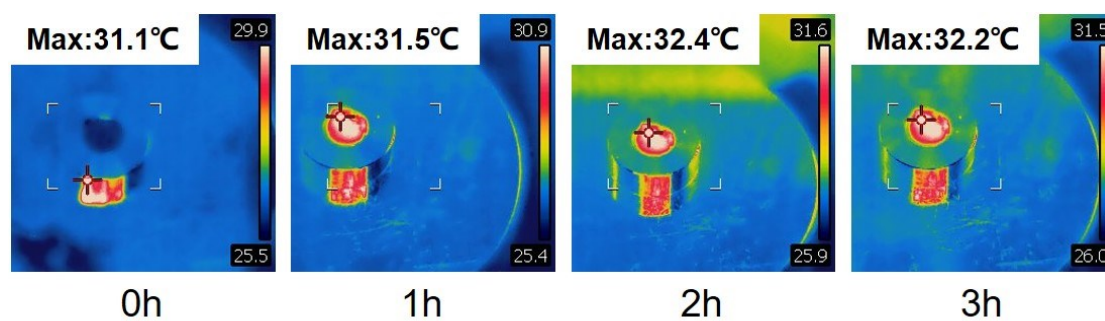

Figure S1: Photothermal images of TW0 under irradiation of 300-800 nm light with an intensity of 100 mW/cm<sup>2</sup>.

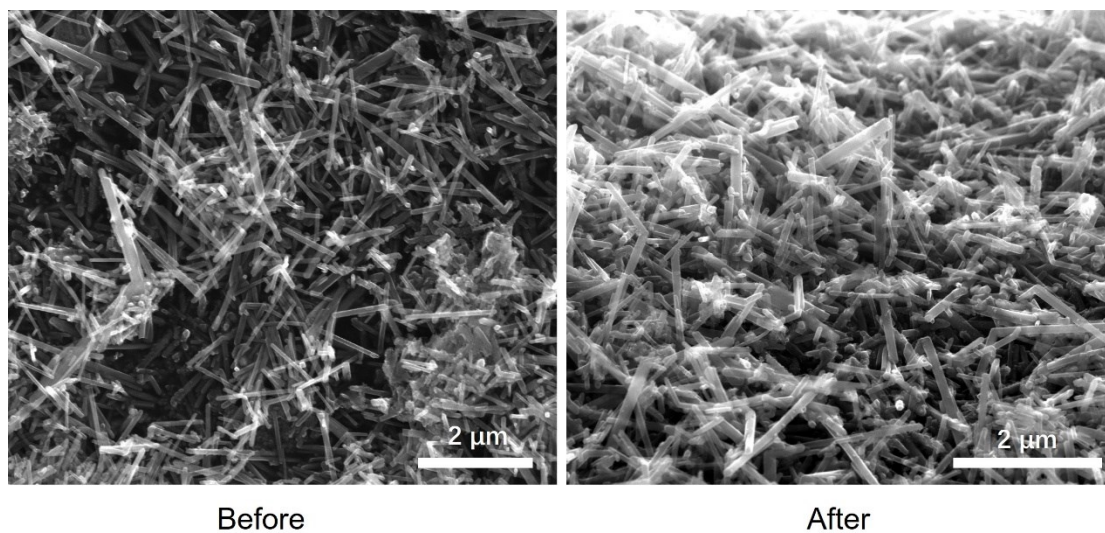

Figure S2: SEM images of TW4 before and after photothermocatalytic CO<sub>2</sub> reduction.

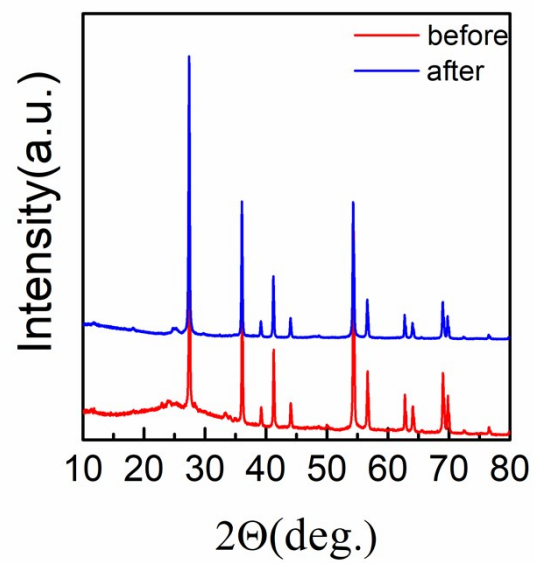

Figure S3: XRD patterns of TW4 before and after photothermocatalytic  $\text{CO}_2$  reduction.

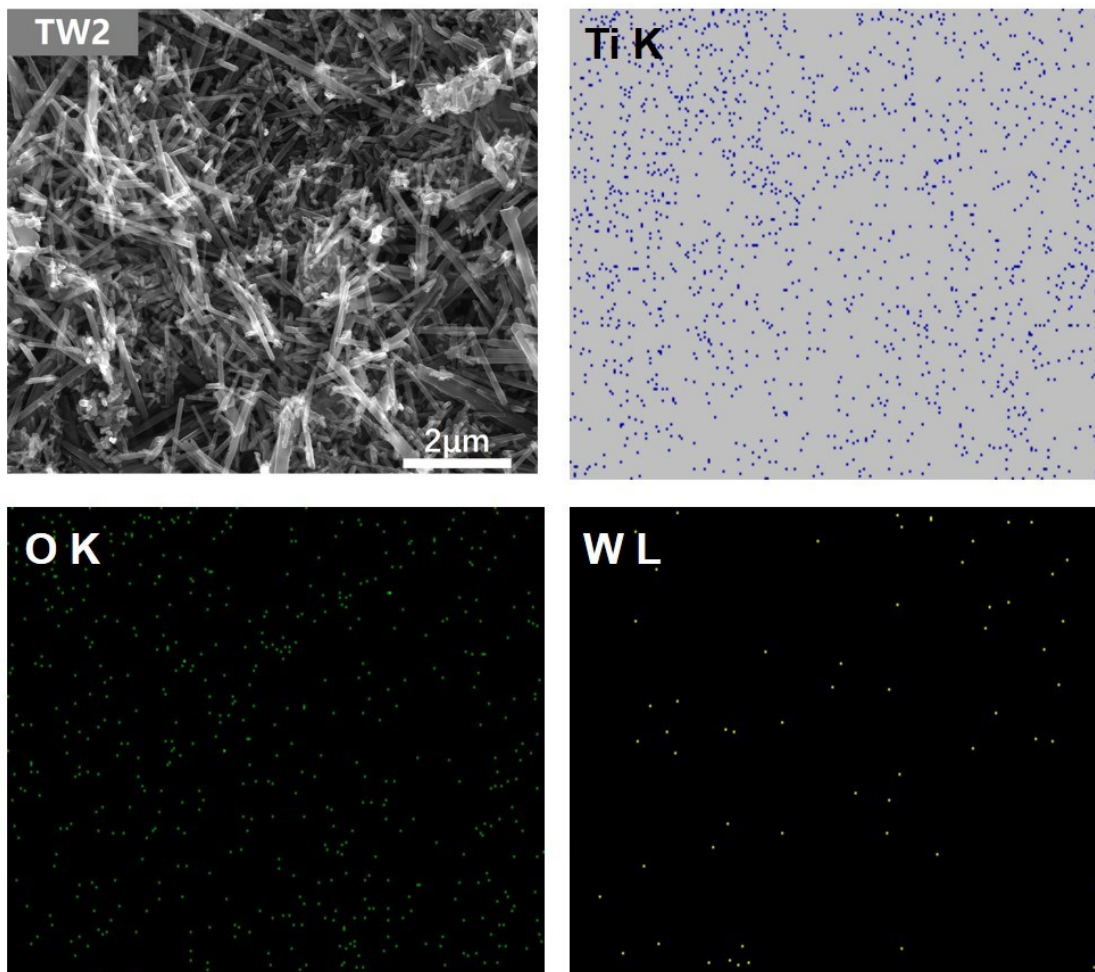

Figure S4: SEM image and element distribution of Ti, O, and W atoms over sample TW2.

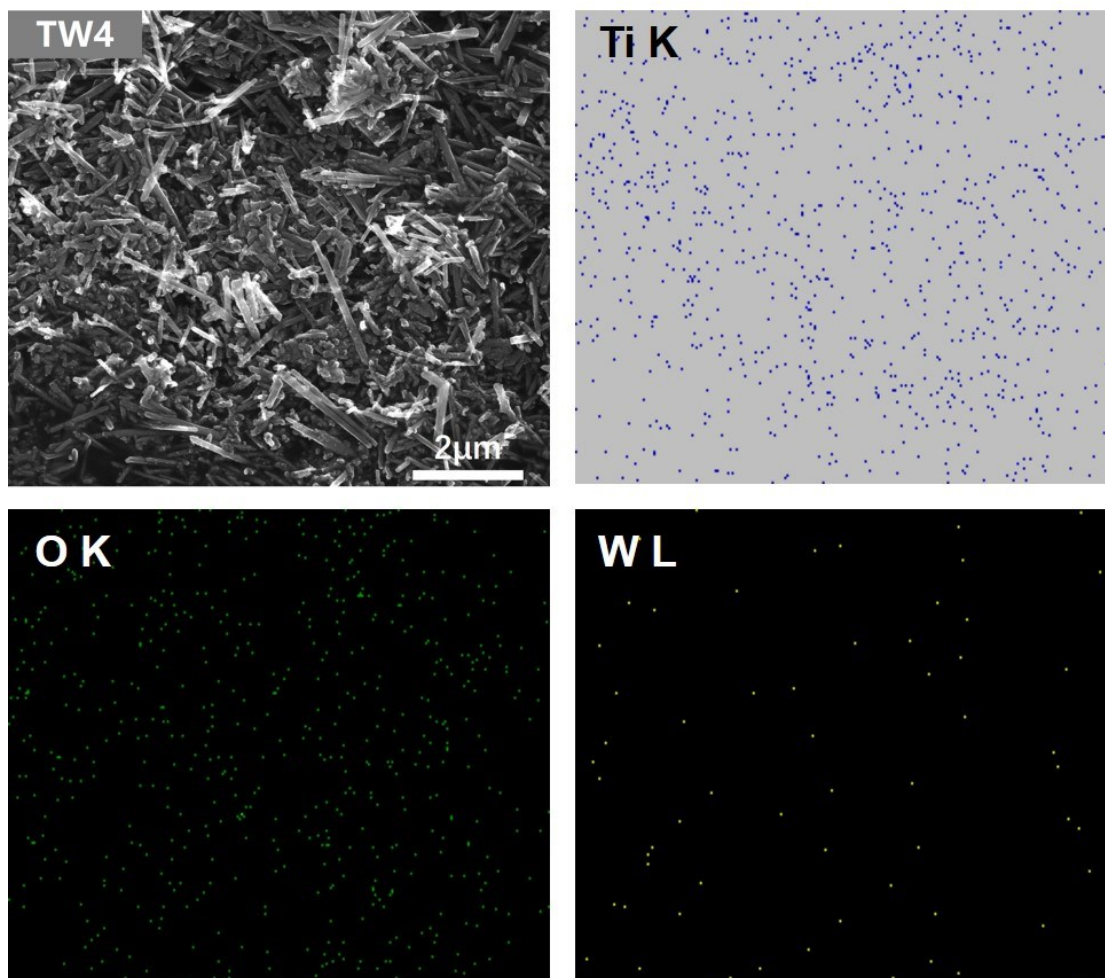

Figure S5: SEM image and element distribution of Ti, O, and W atoms over sample TW4.

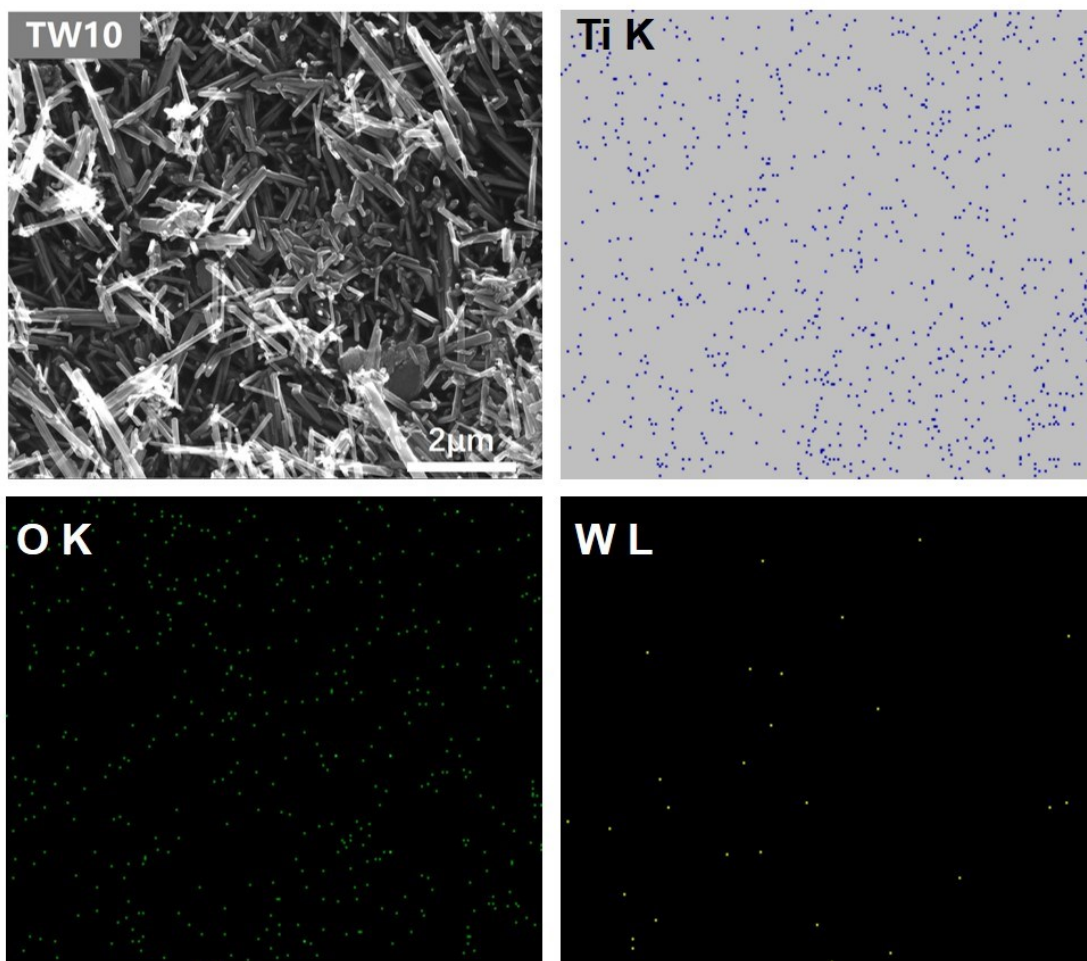

Figure S6: SEM image and element distribution of Ti, O, and W atoms over sample TW10.

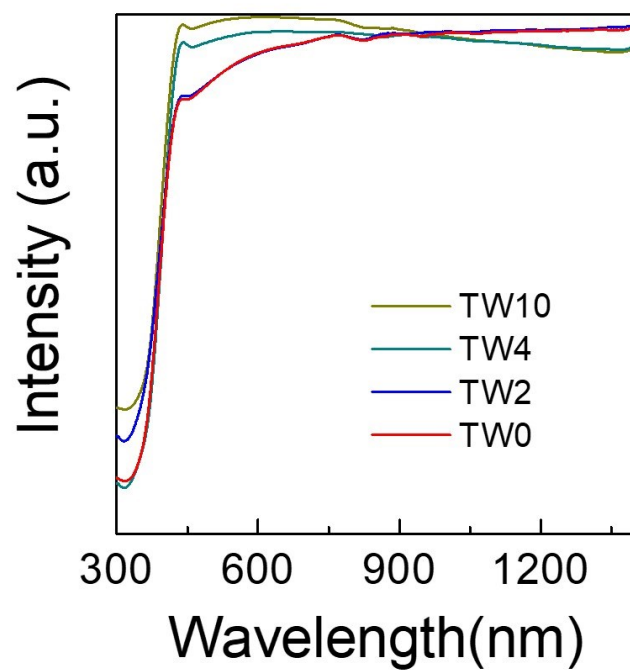

Figure S7: UV-Vis spectra of TW0, TW2, TW4, and TW10. For sample TW4 and TW10, there is a wide absorption in near-infrared region, which indicates that shallow energy levels appear under  $\text{TiO}_2$  conduction band.

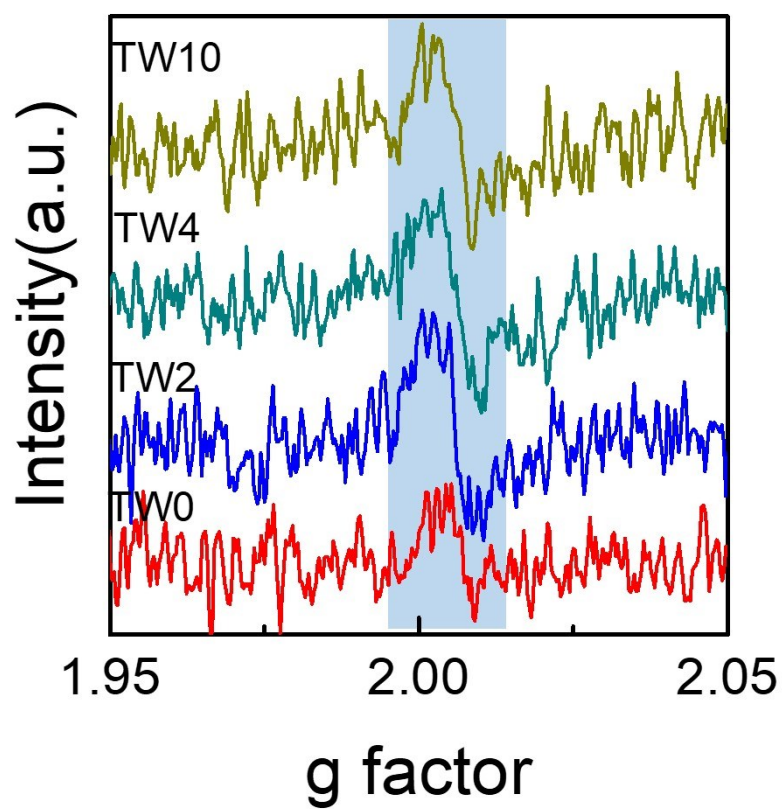

Figure S8: ESR spectra of different samples at 110 K with UV irradiation.

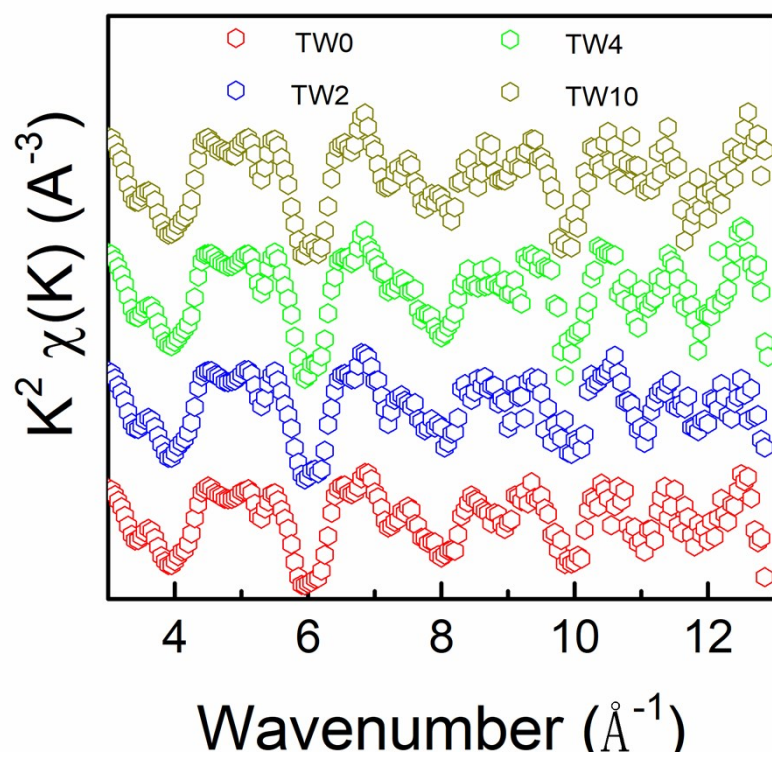

Figure S9: Ti K-edge EXAFS spectra of different samples.

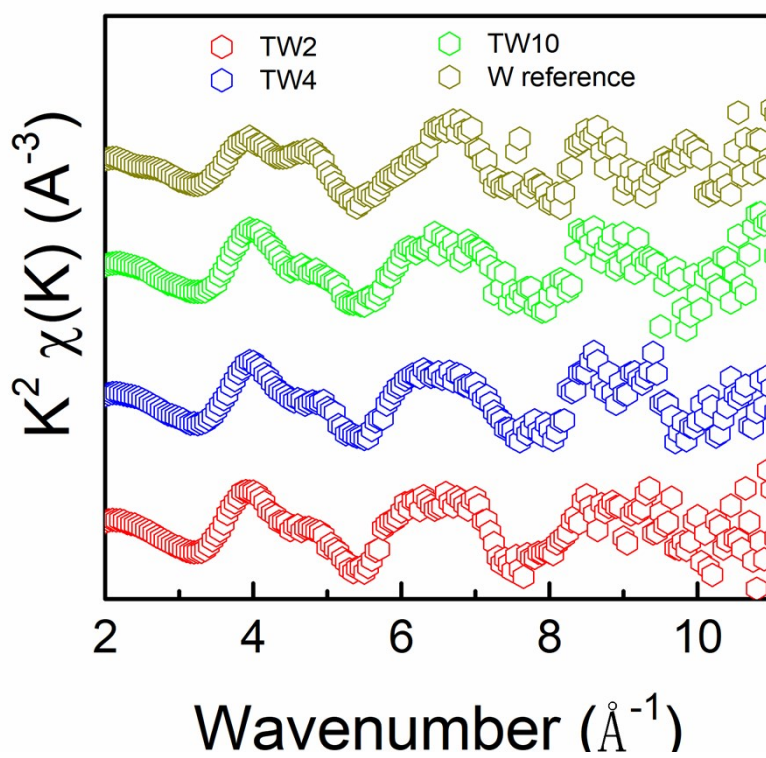

Figure S10: W  $L_{III}$ -edge EXAFS spectra of different samples.

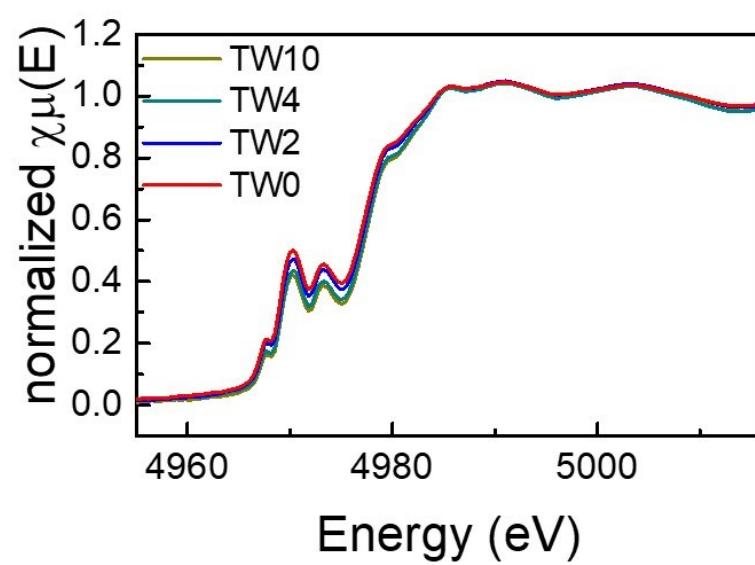

Figure S11: Ti K-edge XANES spectra of different samples.

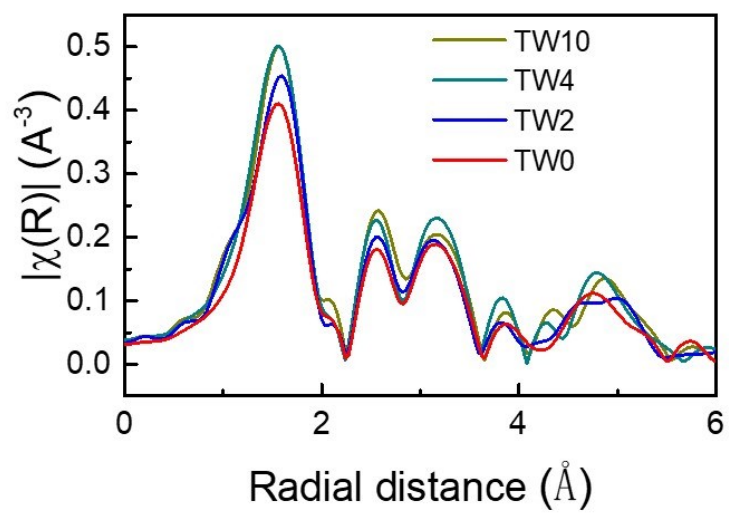

Figure S12: Ti K-edge FT spectra of different samples.

Table S1 W-O bond distances of W reference

| W <sub>1</sub> -O | W <sub>2</sub> -O | W <sub>3</sub> -O | W <sub>4</sub> -O | W <sub>5</sub> -O | W <sub>6</sub> -O |
|-------------------|-------------------|-------------------|-------------------|-------------------|-------------------|
| 1.92012           | 1.88164           | 2.03681           | 2.18778           | 2.23066           | 2.26398           |
| 2.01686           | 1.84144           | 2.15896           | 1.89132           | 2.34611           | 1.94090           |
| 1.72191           | 1.70987           | 1.75051           | 2.24440           | 1.94391           | 2.19829           |
| 2.30365           | 2.29690           | 2.18786           | 1.95492           | 1.86406           | 1.95695           |
| 1.80985           | 1.93387           | 1.88231           | 1.77405           | 1.72376           | 1.75852           |
| 1.86420           | 1.95530           | 1.79305           | 1.74242           | 1.75391           | 1.74152           |

The value unit of bond distance is Å.

Table S2 Coordination number of W reference

|           | R       | Number<br>of bonds | Average<br>bond distance | Coordination<br>Number |
|-----------|---------|--------------------|--------------------------|------------------------|
| *Group I  | < 2.1 Å | 26                 | 1.852 Å                  | 4.33                   |
| *Group II | >2.1 Å  | 10                 | 2.242 Å                  | 1.67                   |

\*All bonds were divided into two groups according to whether the bond length was greater than 2.1 Å.
